# Supplementary material
Source: MDPI journal article supplement (https://www.mdpi.com/2673-4583/5/1/50)
Supplement: s1 [file s1]

# Optimization of bioactive compounds with antioxidant activity of *Himantalia elongata* by microwave assisted extraction using Response surface methodology.

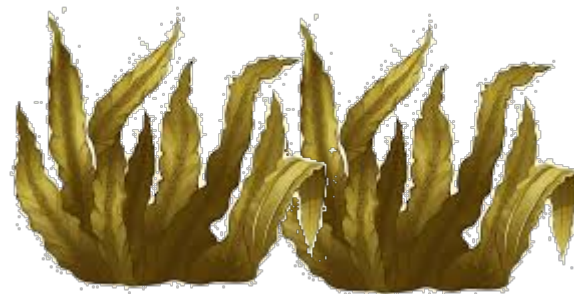

F. Chamorro , L. Cassani , C. Lourenço-Lopes , A. Carreira-Casais , M. Carpena , J. Echave , S. Baamonde , F. Fernández-Saa , Paz Otero , P. Garcia-Perez, J. Simal-Gandara , and M.A. Prieto

Correspondence: [mprieto@uvigo.es](mailto:mprieto@uvigo.es); M.A.P. and [jsimal@uvigo.es](mailto:jsimal@uvigo.es); J.S.G

# INTRODUCTION

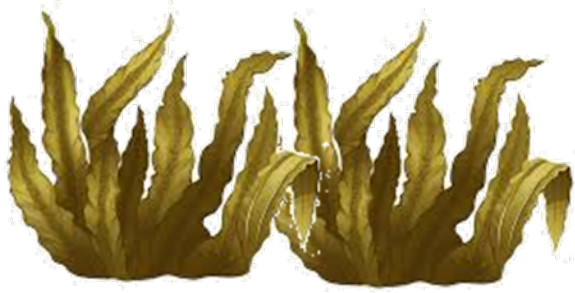

*Himanthalia elongata*

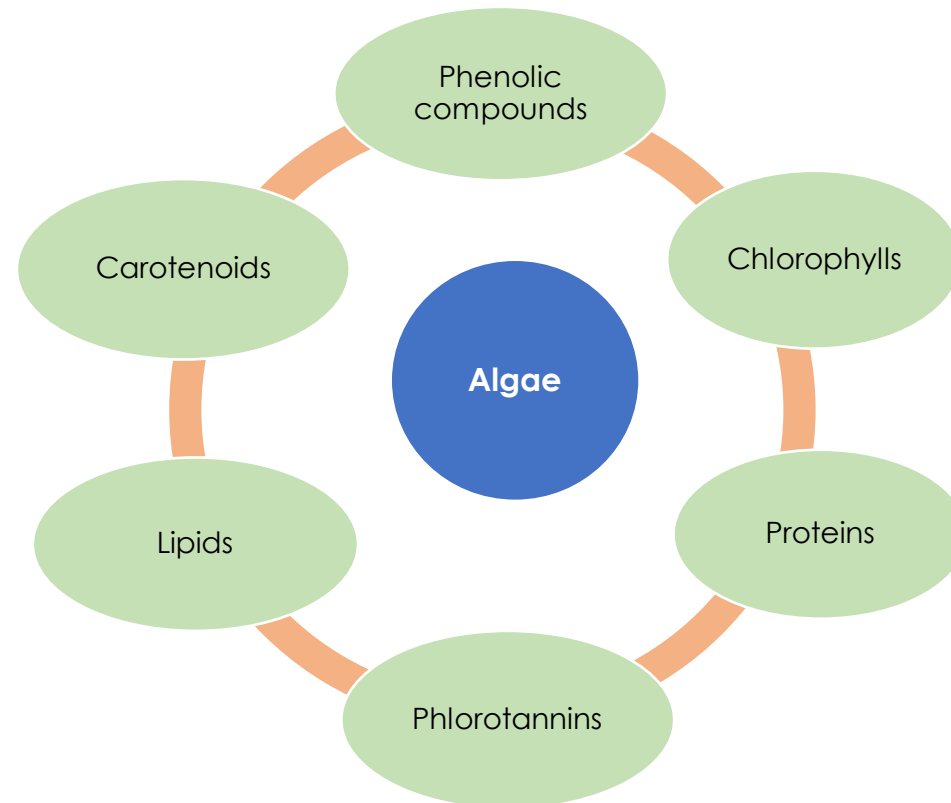

## Bioactivities

- Antioxidant
- Antimicrobial
- Antifungal
- Anti-inflammatory
- Antiproliferative cytotoxicity
- UV protection

## INTRODUCTION

- ✓ Traditionally, algae have been used as food and for medicinal purposes
- ✓ *Himanthalia elongata* is a brown algae of the order Fucales, found mainly in the N-W Atlantic Ocean and the North Sea.
- ✓ It is estimated that the value of the algae industry by 2025 will be 25,000 M \$.

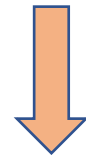

Industrial relevance

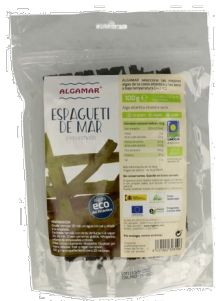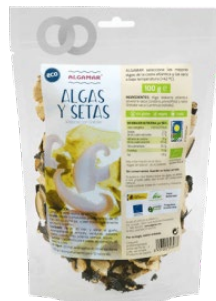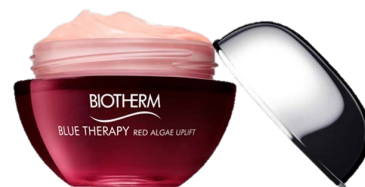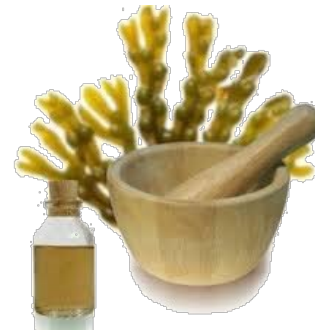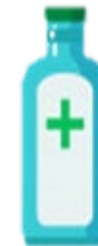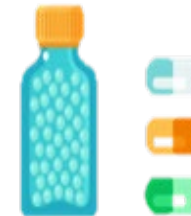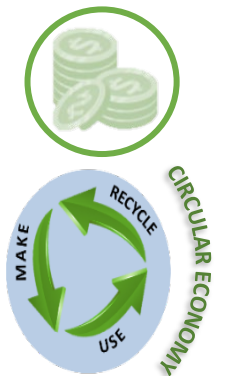

## OBJECTIVES

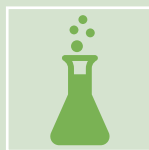

Obtain extracts rich in compounds with potential functional properties.

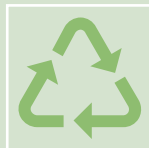

Use "green" technologies to produce macroalgae extracts, contributing to sustainable exploitation.

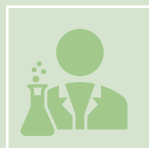

Optimize the parameters ( $t$ ,  $P$  and  $E_t$ ) that affect the extraction of bioactive compounds from *Himanthalia elongata* using the Response Surface Methodology (RSM) and simultaneously maximize the radical scavenging activity and the total phenol content.

# METHODOLOGY

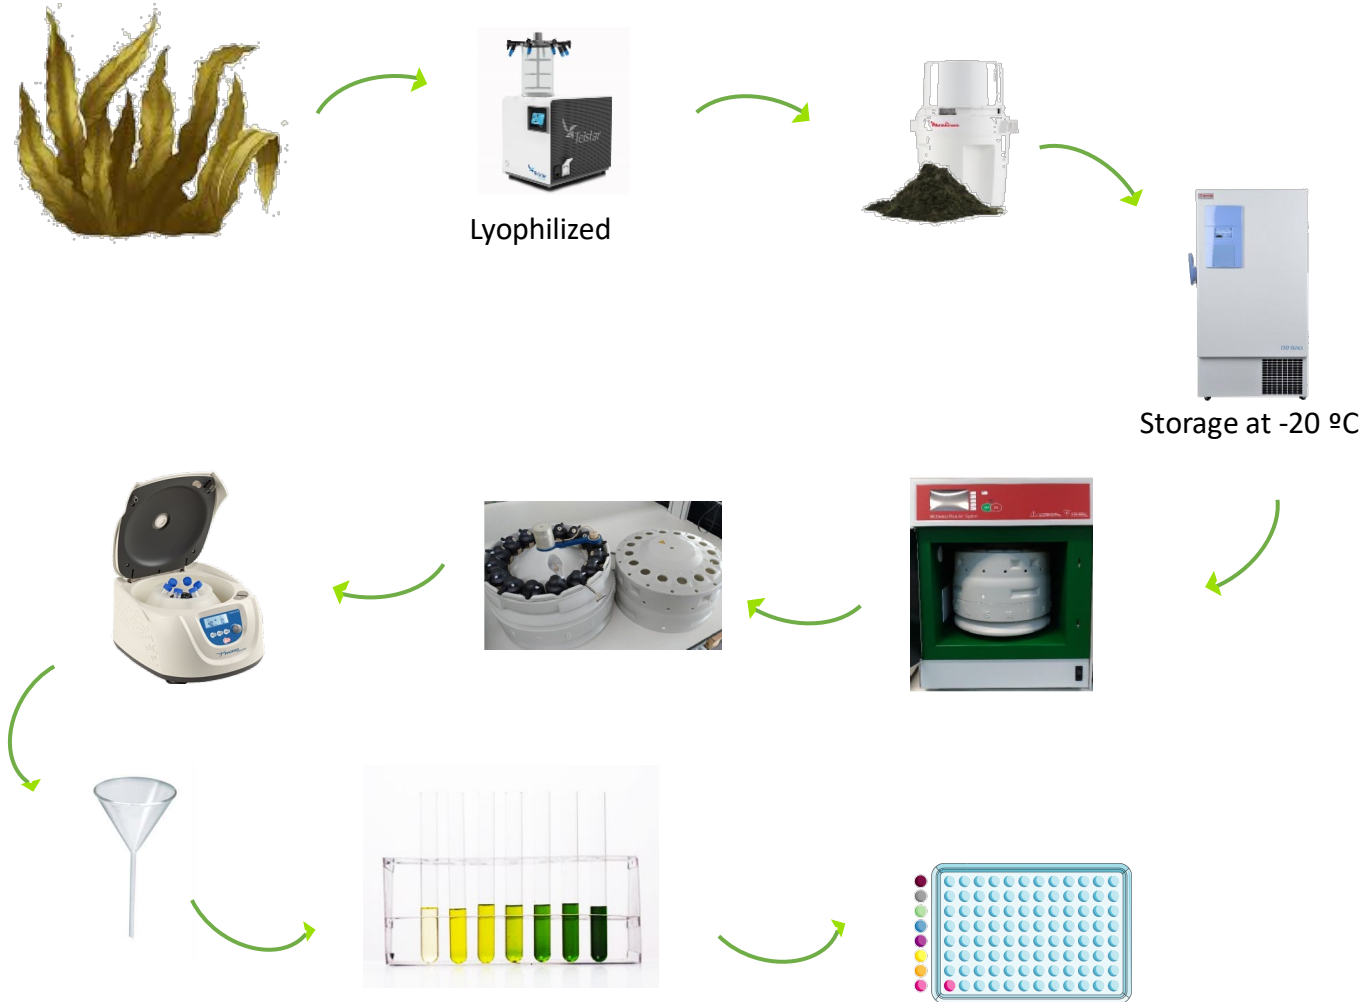

T, P, % Et variables  
Pw: 1400 W

Ice bath for 5 min

9000 rpm for 15 min

Filter paper

-80 °C for 24h

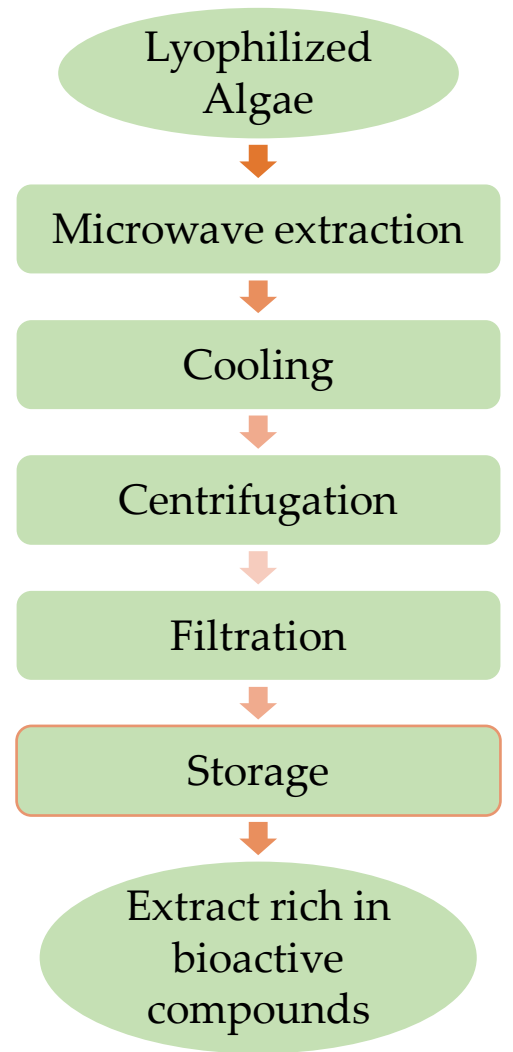

# METHODOLOGY

Extract rich in  
bioactive  
compounds

Yield  
(% DW)

Content of  
bioactive  
compounds

Antioxidant  
activity

Total phenolic  
content

Total flavonoids  
content

DPPH  
scavenging  
capacity

Antioxidant  
capacity of Trolox  
equivalents

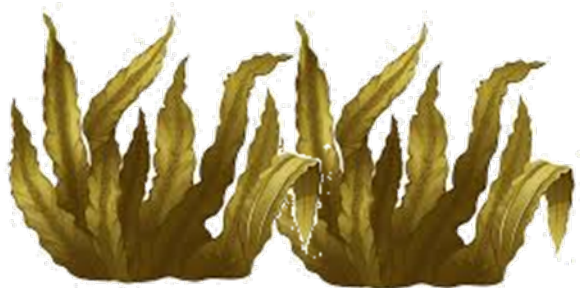

# METHODOLOGY

**Table 1.** Experimental design for optimization

|    | Independent variables |                |                    |
|----|-----------------------|----------------|--------------------|
|    | $X_1$ : t (min)       | $X_2$ : P(bar) | $X_3$ : Et (% v/v) |
| 1  | -1 (7,5)              | -1 (5,6)       | -1 (20,3)          |
| 2  | -1 (7,5)              | -1 (5,6)       | 1 (79,7)           |
| 3  | -1 (7,5)              | 1 (16,4)       | -1 (20,3)          |
| 4  | -1 (7,5)              | 1 (16,4)       | 1 (79,7)           |
| 5  | 1 (20,5)              | -1 (5,6)       | -1 (20,3)          |
| 6  | 1 (20,5)              | -1 (5,6)       | 1 (79,7)           |
| 7  | 1 (20,5)              | 1 (16,4)       | -1 (20,3)          |
| 8  | 1 (20,5)              | 1 (16,4)       | 1 (79,7)           |
| 9  | -1,68 (3)             | 0 (11)         | 0 (50)             |
| 10 | 1,68 (25)             | 0 (11)         | 0 (50)             |
| 11 | 0 (14)                | -1,68 (2)      | 0 (50)             |
| 12 | 0 (14)                | 1,68 (20)      | 0 (50)             |
| 13 | 0 (14)                | 0 (11)         | -1,68 (0)          |
| 14 | 0 (14)                | 0 (11)         | 1,68 (100)         |
| 15 | -1,68 (3)             | -1,68 (2)      | -1,68 (0)          |
| 16 | -1,68 (3)             | -1,68 (2)      | 1,68 (100)         |
| 17 | -1,68 (3)             | 1,68 (20)      | -1,68 (0)          |
| 18 | -1,68 (3)             | 1,68 (20)      | 1,68 (100)         |
| 19 | 1,68 (25)             | -1,68 (2)      | -1,68 (0)          |
| 20 | 1,68 (25)             | -1,68 (2)      | 1,68 (100)         |
| 21 | 1,68 (25)             | 1,68 (20)      | -1,68 (0)          |
| 22 | 1,68 (25)             | 1,68 (20)      | 1,68 (100)         |
| 23 | 0 (14)                | 0 (11)         | 0 (50)             |
| 24 | 0 (14)                | 0 (11)         | 0 (50)             |
| 25 | 0 (14)                | 0 (11)         | 0 (50)             |
| 26 | 0 (14)                | 0 (11)         | 0 (50)             |
| 27 | 0 (14)                | 0 (11)         | 0 (50)             |
| 28 | 0 (14)                | 0 (11)         | 0 (50)             |

CIRCUMSCRIBED  
CENTRAL COMPOSITE  
DESIGN  
(CCCD)

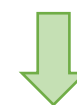

- 5 levels
- 3 coded variables

28 experimental  
points

Independent variables  
studied:

- Time ( $X_1$ ): 3 – 25 min
- Pressure ( $X_2$ ): 2 – 20 bar
- EtOH concentration ( $X_3$ ): 0 – 100 % (aqueous-ethanol, v/v)

Solid - liquid  
ratio: 30 g/L

# METHODOLOGY

Table 1. Experimental design for optimization

|    | Independent variables    |                         |                             |
|----|--------------------------|-------------------------|-----------------------------|
|    | X <sub>1</sub> : t (min) | X <sub>2</sub> : P(bar) | X <sub>3</sub> : Et (% v/v) |
| 1  | -1 (7,5)                 | -1 (5,6)                | -1 (20,3)                   |
| 2  | -1 (7,5)                 | -1 (5,6)                | 1 (79,7)                    |
| 3  | -1 (7,5)                 | 1 (16,4)                | -1 (20,3)                   |
| 4  | -1 (7,5)                 | 1 (16,4)                | 1 (79,7)                    |
| 5  | 1 (20,5)                 | -1 (5,6)                | -1 (20,3)                   |
| 6  | 1 (20,5)                 | -1 (5,6)                | 1 (79,7)                    |
| 7  | 1 (20,5)                 | 1 (16,4)                | -1 (20,3)                   |
| 8  | 1 (20,5)                 | 1 (16,4)                | 1 (79,7)                    |
| 9  | -1,68 (3)                | 0 (11)                  | 0 (50)                      |
| 10 | 1,68 (25)                | 0 (11)                  | 0 (50)                      |
| 11 | 0 (14)                   | -1,68 (2)               | 0 (50)                      |
| 12 | 0 (14)                   | 1,68 (20)               | 0 (50)                      |
| 13 | 0 (14)                   | 0 (11)                  | -1,68 (0)                   |
| 14 | 0 (14)                   | 0 (11)                  | 1,68 (100)                  |
| 15 | -1,68 (3)                | -1,68 (2)               | -1,68 (0)                   |
| 16 | -1,68 (3)                | -1,68 (2)               | 1,68 (100)                  |
| 17 | -1,68 (3)                | 1,68 (20)               | -1,68 (0)                   |
| 18 | -1,68 (3)                | 1,68 (20)               | 1,68 (100)                  |
| 19 | 1,68 (25)                | -1,68 (2)               | -1,68 (0)                   |
| 20 | 1,68 (25)                | -1,68 (2)               | 1,68 (100)                  |
| 21 | 1,68 (25)                | 1,68 (20)               | -1,68 (0)                   |
| 22 | 1,68 (25)                | 1,68 (20)               | 1,68 (100)                  |
| 23 | 0 (14)                   | 0 (11)                  | 0 (50)                      |
| 24 | 0 (14)                   | 0 (11)                  | 0 (50)                      |
| 25 | 0 (14)                   | 0 (11)                  | 0 (50)                      |
| 26 | 0 (14)                   | 0 (11)                  | 0 (50)                      |
| 27 | 0 (14)                   | 0 (11)                  | 0 (50)                      |
| 28 | 0 (14)                   | 0 (11)                  | 0 (50)                      |

## Response Surface Methodology (RSM)

$$Y = \underbrace{b_0}_{\text{Intercept}} + \underbrace{\sum_{i=1}^n b_i X_i}_{\text{Linear effect}} + \underbrace{\sum_{i=1}^{n-1} \sum_{\substack{j=2 \\ j>i}}^n b_{ij} X_i X_j}_{\text{Interactive effect}} + \underbrace{\sum_{i=1}^n b_{ii} X_i^2}_{\text{Quadratic effect}}$$

### Response variables (dependent):

Y<sub>1</sub>: % of extraction yield

Y<sub>2</sub>: mg of total phenolics per g of dried seaweed



## RESULTS

**Table 2.** Experimental results of 28 experiments for the optimization process.

| Run | Independent variables |        |                |        |               |        | Response variables |       |       |       |       |
|-----|-----------------------|--------|----------------|--------|---------------|--------|--------------------|-------|-------|-------|-------|
|     | <i>t</i> (min)        |        | <i>P</i> (bar) |        | <i>Et</i> (%) |        | EY                 | TPC   | TFC   | DPPH  | ABTS  |
| 1   | -1                    | (7.5)  | -1             | (5.6)  | -1            | (20.3) | 452                | 24.58 | 2.60  | 5.64  | 12.24 |
| 2   | -1                    | (7.5)  | -1             | (5.6)  | 1             | (79.7) | 355                | 28.26 | 6.14  | 6.59  | 80.08 |
| 3   | -1                    | (7.5)  | 1              | (16.4) | -1            | (20.3) | 529                | 41.30 | 4.28  | 19.97 | 21.38 |
| 4   | -1                    | (7.5)  | 1              | (16.4) | 1             | (79.7) | 376                | 25.52 | 5.31  | 5.33  | 20.41 |
| 5   | 1                     | (20.5) | -1             | (5.6)  | -1            | (20.3) | 543                | 19.24 | 2.36  | 4.47  | 9.43  |
| 6   | 1                     | (20.5) | -1             | (5.6)  | 1             | (79.7) | 384                | 23.90 | 5.11  | 6.29  | 22.01 |
| 7   | 1                     | (20.5) | 1              | (16.4) | -1            | (20.3) | 489                | 38.86 | 5.59  | 19.68 | 19.70 |
| 8   | 1                     | (20.5) | 1              | (16.4) | 1             | (79.7) | 361                | 19.75 | 4.40  | 3.84  | 15.87 |
| 9   | -1.68                 | (3)    | 0              | (11)   | 0             | (50)   | 459                | 25.56 | 2.92  | 4.70  | 22.12 |
| 10  | 1.68                  | (25)   | 0              | (11)   | 0             | (50)   | 370                | 37.70 | 4.02  | 7.86  | 35.70 |
| 11  | 0                     | (14)   | -1.68          | (2)    | 0             | (50)   | 358                | 28.40 | 4.62  | 8.56  | 59.45 |
| 12  | 0                     | (14)   | 1.68           | (20)   | 0             | (50)   | 479                | 35.49 | 5.51  | 14.32 | 30.33 |
| 13  | 0                     | (14)   | 0              | (11)   | -1.68         | (0)    | 491                | 25.50 | 11.31 | 11.28 | 15.12 |
| 14  | 0                     | (14)   | 0              | (11)   | 1.68          | (100)  | 109                | 11.89 | 4.19  | 5.66  | 22.58 |
| 15  | -1.68                 | (3)    | -1.68          | (2)    | -1.68         | (0)    | 373                | 7.53  | 1.35  | 1.01  | 16.08 |
| 16  | -1.68                 | (3)    | -1.68          | (2)    | 1.68          | (100)  | 60                 | 12.87 | 0.73  | 4.11  | 16.08 |
| 17  | -1.68                 | (3)    | 1.68           | (20)   | -1.68         | (0)    | 409                | 27.64 | 7.44  | 10.34 | 23.34 |
| 18  | -1.68                 | (3)    | 1.68           | (20)   | 1.68          | (100)  | 99                 | 10.14 | 4.61  | 3.57  | 7.22  |
| 19  | 1.68                  | (25)   | -1.68          | (2)    | -1.68         | (0)    | 459                | 8.10  | 1.92  | 1.05  | 74.57 |
| 20  | 1.68                  | (25)   | -1.68          | (2)    | 1.68          | (100)  | 67                 | 5.36  | 2.73  | 2.77  | 7.44  |
| 21  | 1.68                  | (25)   | 1.68           | (20)   | -1.68         | (0)    | 443                | 29.75 | 9.20  | 13.43 | 37.66 |
| 22  | 1.68                  | (25)   | 1.68           | (20)   | 1.68          | (100)  | 133                | 3.89  | 7.78  | 3.95  | 8.18  |
| 23  | 0                     | (14)   | 0              | (11)   | 0             | (50)   | 377                | 35.62 | 2.62  | 9.58  | 61.86 |
| 24  | 0                     | (14)   | 0              | (11)   | 0             | (50)   | 377                | 32.35 | 4.26  | 9.11  | 60.83 |
| 25  | 0                     | (14)   | 0              | (11)   | 0             | (50)   | 474                | 47.73 | 9.64  | 25.29 | 95.13 |
| 26  | 0                     | (14)   | 0              | (11)   | 0             | (50)   | 425                | 21.61 | 3.29  | 5.60  | 24.28 |
| 27  | 0                     | (14)   | 0              | (11)   | 0             | (50)   | 439                | 21.89 | 3.70  | 4.50  | 22.10 |
| 28  | 0                     | (14)   | 0              | (11)   | 0             | (50)   | 435                | 21.97 | 3.44  | 4.97  | 23.59 |

## RESULTS

**Table 3.** Effect of *H. elongata* extract by MAE under optimal conditions on antioxidant activity.

| Best operating conditions | %Et                | P (bar)           | T (min)              |               |
|---------------------------|--------------------|-------------------|----------------------|---------------|
|                           | 0.00 ± 0.00        | 20.00 ± 0.50      | 16.01 ± 4.80         |               |
| EY<br>mg/g of dw          | TPC<br>mg PGE/g dw | TFC<br>mg QE/g dw | Antioxidant Activity |               |
|                           |                    |                   | DPPH<br>mg/mL        | ABTS<br>mg/mL |
| 502.28 ± 25.11            | 37.43 ± 3.74       | 9.93 ± 0.99       | 16.37 ± 0.82         | 65.77 ± 1.97  |

## CONCLUSION

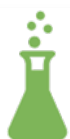

Aqueous microwave-assisted extraction (**20 bar, 16 min**) appears to be the optimal processing method for the extraction of polyphenols with antioxidant activity from *Himanthalia elongata* without the need for organic solvents.

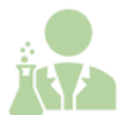

These are promising results because the polyphenol content was maximized using an environmentally friendly technique free of organic solvents.
